# Supplementary material for: Fatty-acid receptor CD36 functions as a hydrogen sulfide-targeted receptor with its Cys333-Cys272 disulfide bond serving as a specific molecular switch to accelerate gastric cancer metastasis
Source: PubMed Central journal article supplement — eBioMedicine. 2019 Jun 28;45:108–23. doi: 10.1016/j.ebiom.2019.06.037 (PMC6642364; doi:10.1016/j.ebiom.2019.06.037), 2019-06-28

A.

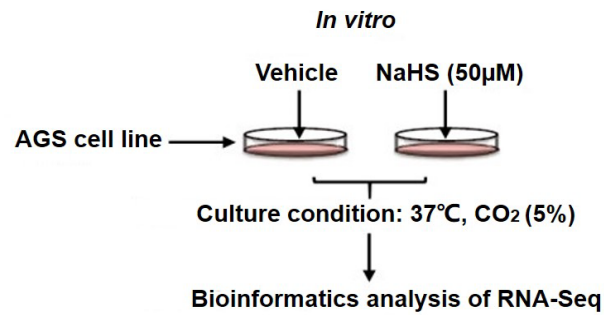

B.

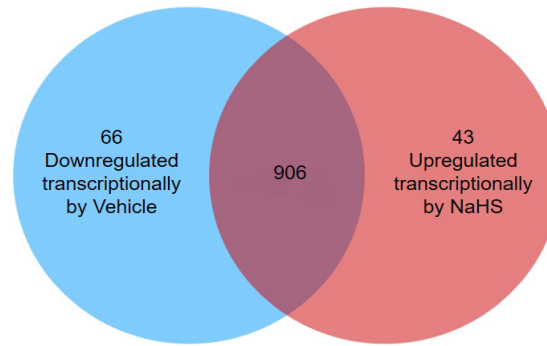

C.

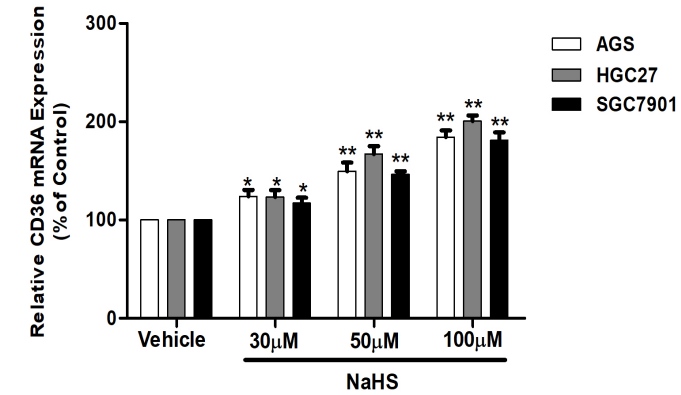

D.

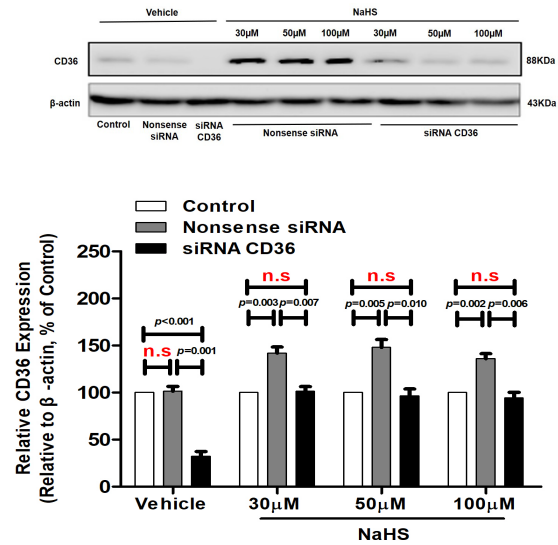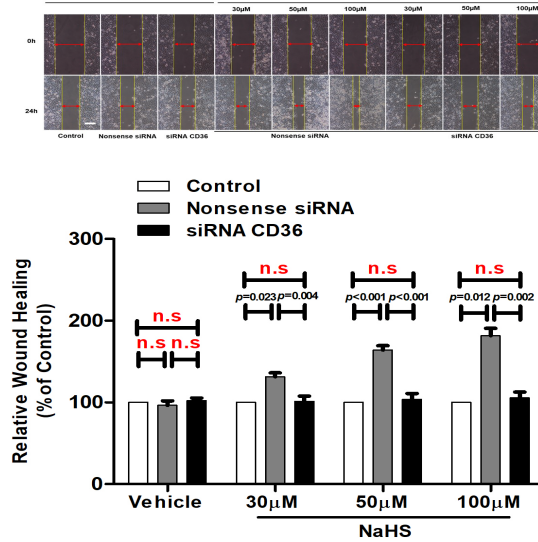

E.

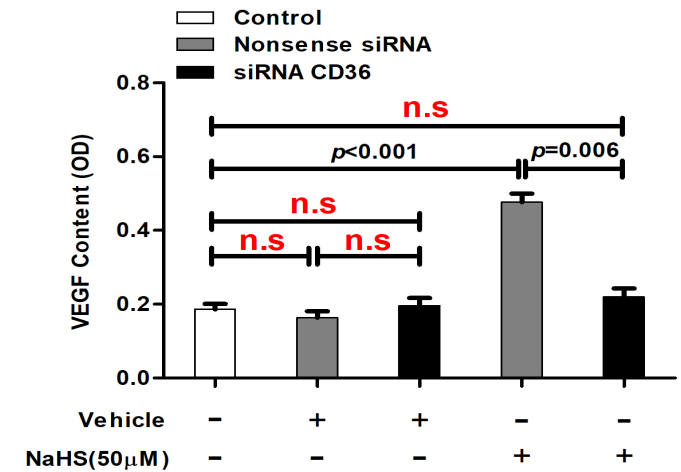

F.

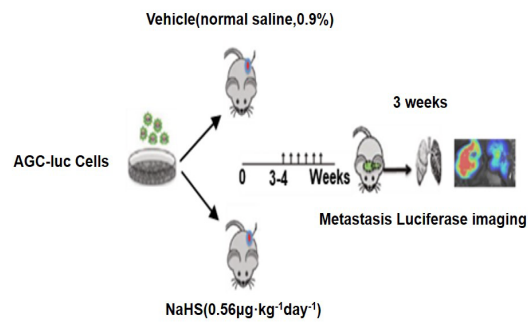

G.

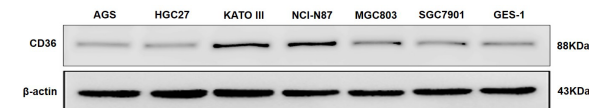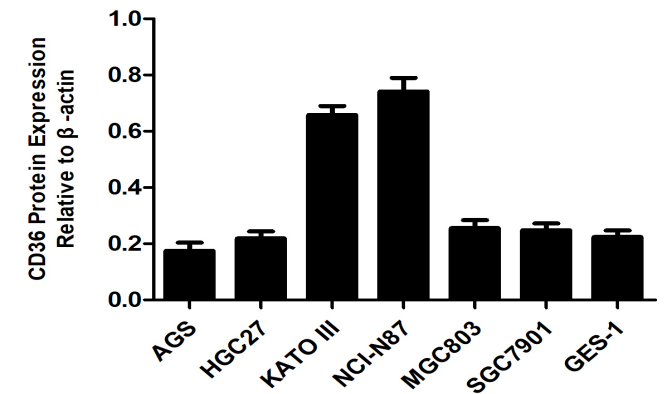

A.

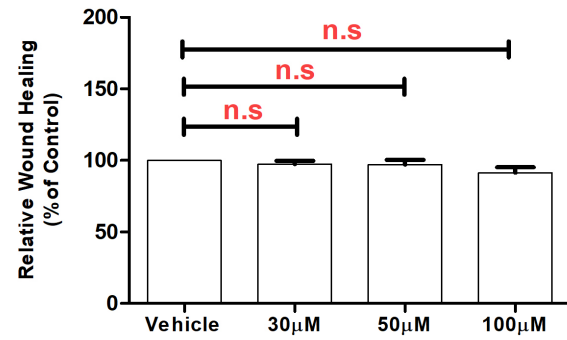

B.

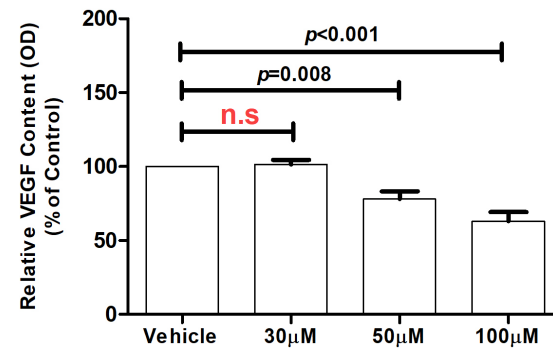

C.

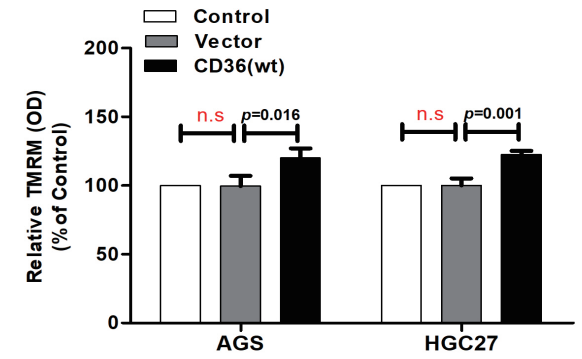

D.

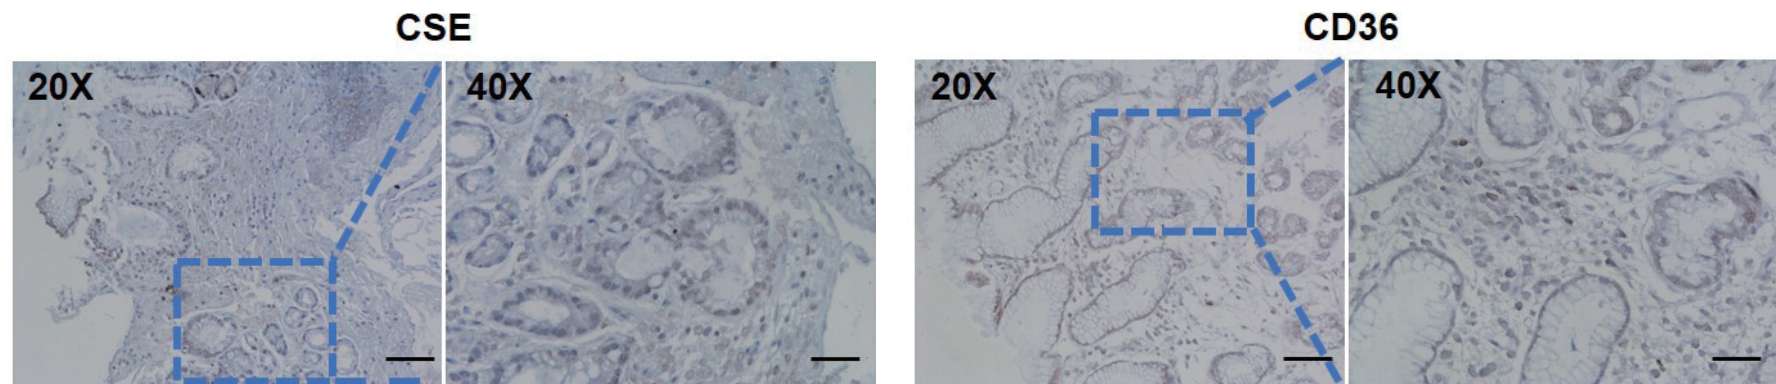

A.

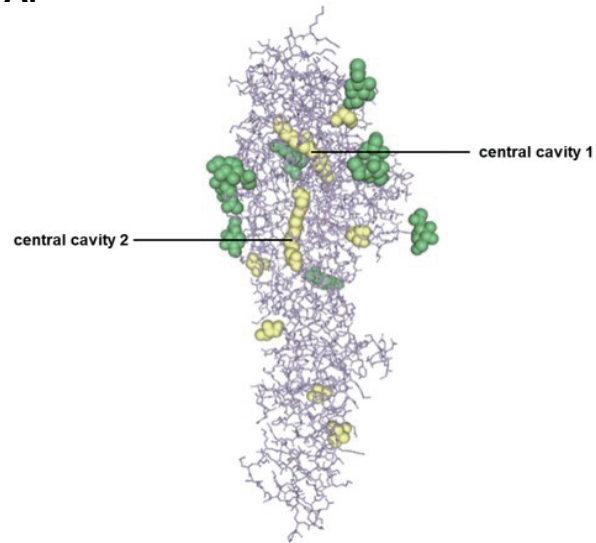

B.

```

MGCDRNCGLIAGAVIGAVLAVFGGILMPVGDLLIQTKIKKQVVEEGTIAFKNWVKGTGE
VYRQFWIFDVQNPQEVMMNSSNIQVKRGPYTYRVRF LAKENVTDQAEDNTVSLQPNGA
IFEPSLSVGT EADNFVTLNLAVAAASHYQNFVQMI LNSL IKKSKSSMFQVRTLRELLW
                                                    164 166
GYRDPFLSLVPYPVTTTVGLFYPYNNADGVYKVFNGKDNISKVAIIDTYKGRNLSYWE
SHCDMINGTDAASFPPFVEKSQVLQFFSSDICRSIYAVFESDNLKGPVYRFVLPKAF
ASPVENPDNYCFCTEKIISKNCTSYGVLDISKCKEGRPVVISLPHFLYASPDVSEPIDGL
                                                    332 333 334
NPNEEEHRTYLDIEPITGFTLQFAKRLQVNL LKVPSEKIQLKLNKRNYIVPILWLNETG
TIGDEKANMFRSQVTGKINLLGLIEMILLSVGVVMFVAFMISYCACRSKTIK
  
```

disulfide bond

D.

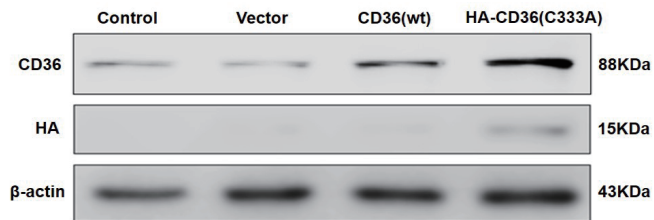

E.

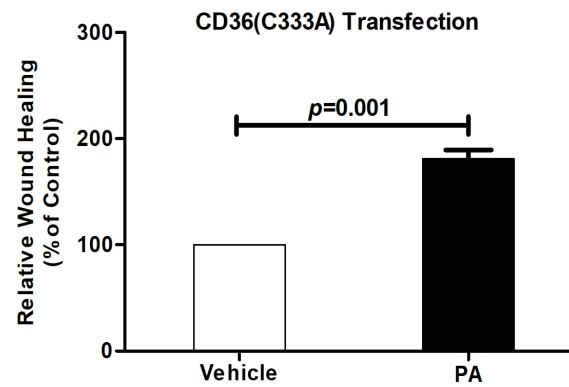

C.

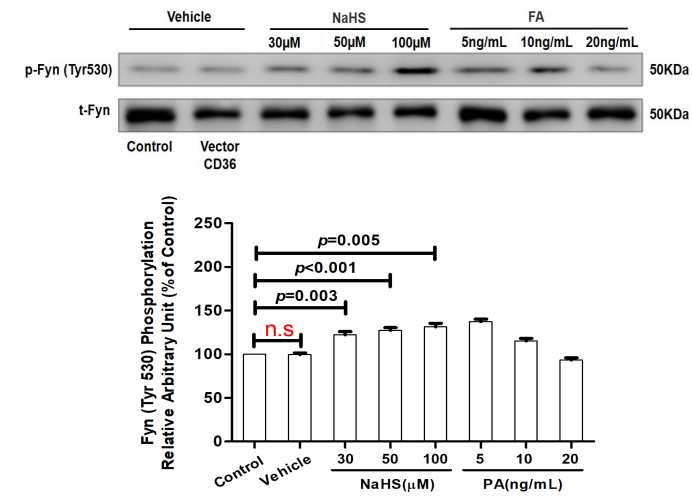

F.

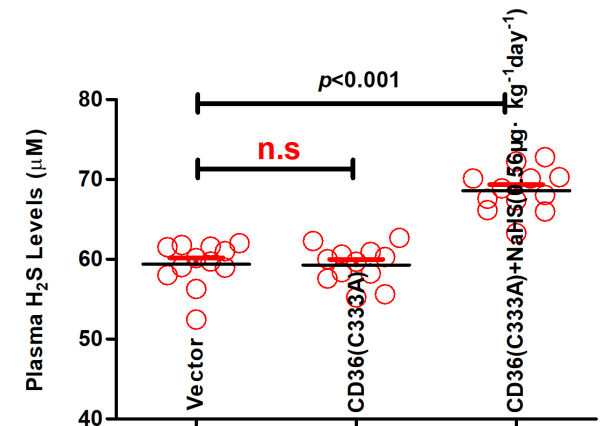

G.

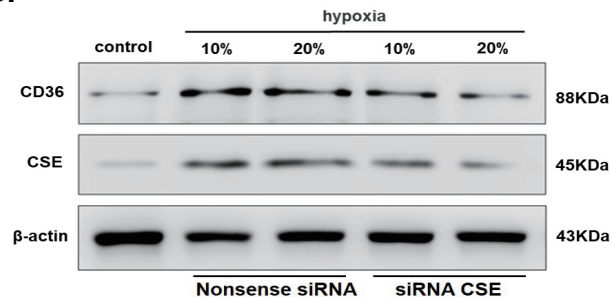

A.

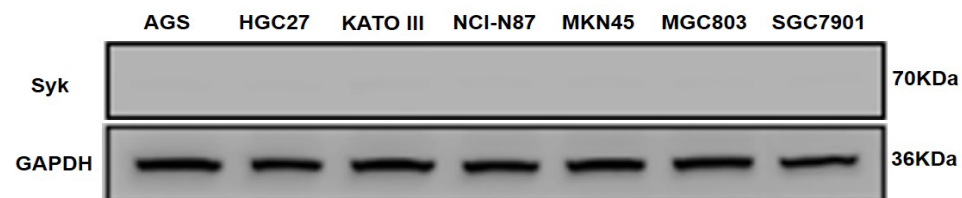

B.

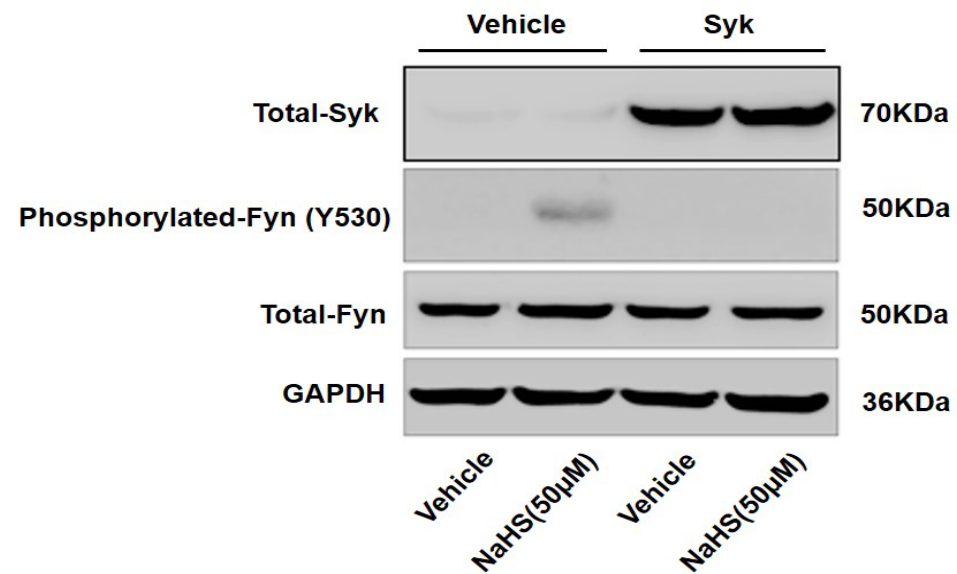

C.

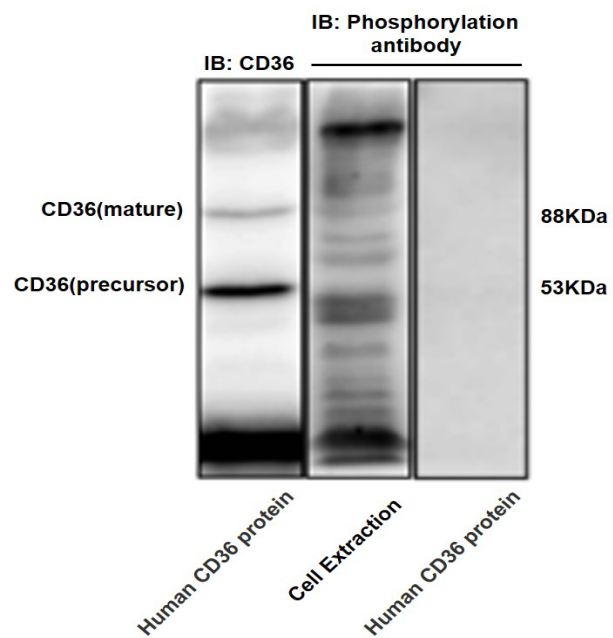

D.

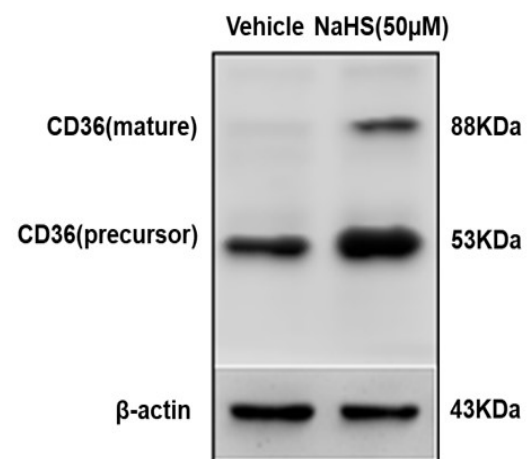

E.

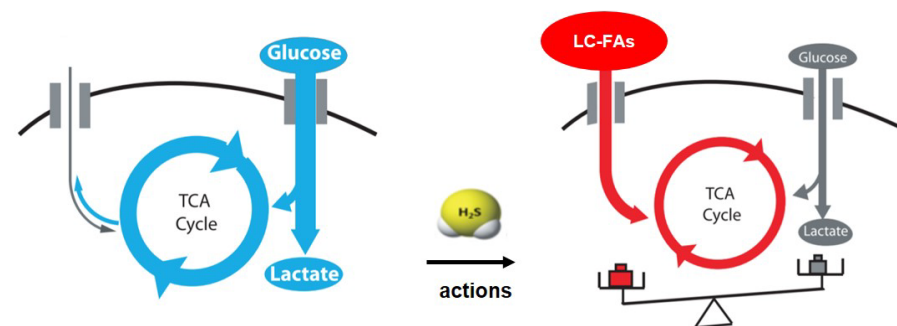

Supplement: mmc1.pdf [file mmc1.pdf]
