# Supplementary material for: Fatty-acid receptor CD36 functions as a hydrogen sulfide-targeted receptor with its Cys333-Cys272 disulfide bond serving as a specific molecular switch to accelerate gastric cancer metastasis
Source: PubMed Central journal article supplement — eBioMedicine. 2019 Jun 28;45:108–23. doi: 10.1016/j.ebiom.2019.06.037 (PMC6642364; doi:10.1016/j.ebiom.2019.06.037), 2019-06-28
Supplement: mmc3.pdf [file mmc3.pdf]

Table S1. Summary of patient characteristics and their correlation with CSE expression

| Characteristics           |                       | No%              | CSE expression |             | P value      |
|---------------------------|-----------------------|------------------|----------------|-------------|--------------|
|                           |                       |                  | Negative(%)    | Positive(%) |              |
|                           | <b>Total</b>          | <b>214(100)</b>  | <b>91</b>      | <b>123</b>  |              |
| <b>Sex</b>                | <b>Male</b>           | <b>150(70.1)</b> | <b>48</b>      | <b>52</b>   | <b>0.009</b> |
|                           | <b>Female</b>         | <b>64(29.9)</b>  | <b>29.7</b>    | <b>70.3</b> |              |
| <b>Age</b>                | <b>&lt;70</b>         | <b>173(80.8)</b> | <b>42.2</b>    | <b>57.8</b> | <b>0.143</b> |
|                           | <b>≥70</b>            | <b>41(19.2)</b>  | <b>31.7</b>    | <b>68.3</b> |              |
| <b>H.Pylori infection</b> | <b>No</b>             | <b>136(63.6)</b> | <b>52.2</b>    | <b>47.8</b> | <b>0.000</b> |
|                           | <b>Yes</b>            | <b>78(36.4)</b>  | <b>16.7</b>    | <b>83.3</b> |              |
| <b>Histology</b>          | <b>Adenocarcinoma</b> | <b>198(92.5)</b> | <b>42.9</b>    | <b>57.1</b> | <b>0.258</b> |
|                           | <b>Others</b>         | <b>16(7.5)</b>   | <b>43.8</b>    | <b>56.2</b> |              |
| <b>Tumor size(cm)</b>     | <b>&lt;3</b>          | <b>119(55.6)</b> | <b>54.6</b>    | <b>45.4</b> | <b>0.660</b> |
|                           | <b>3-5</b>            | <b>63(29.4)</b>  | <b>55.6</b>    | <b>44.4</b> |              |
|                           | <b>5-7</b>            | <b>32(15)</b>    | <b>50</b>      | <b>50</b>   |              |
|                           | <b>≥7</b>             | <b>0</b>         | <b>0</b>       | <b>0</b>    |              |
| <b>N stage</b>            | <b>0</b>              | <b>131(61.2)</b> | <b>47.3</b>    | <b>52.7</b> | <b>0.516</b> |
|                           | <b>1</b>              | <b>25(11.7)</b>  | <b>40</b>      | <b>60</b>   |              |
|                           | <b>2</b>              | <b>58(27.1)</b>  | <b>37.9</b>    | <b>62.1</b> |              |
| <b>TNM stage</b>          | <b>I a</b>            | <b>49(22.9)</b>  | <b>69.4</b>    | <b>30.6</b> | <b>0.000</b> |
|                           | <b>I b</b>            | <b>77(36)</b>    | <b>62.3</b>    | <b>37.7</b> |              |
|                           | <b>IIa</b>            | <b>30(14)</b>    | <b>36.7</b>    | <b>63.3</b> |              |
|                           | <b>IIb</b>            | <b>9(4.2)</b>    | <b>33.3</b>    | <b>66.7</b> |              |
|                           | <b>IIIa</b>           | <b>47(22)</b>    | <b>19.1</b>    | <b>80.9</b> |              |
|                           | <b>IIIb</b>           | <b>2(0.9)</b>    | <b>0</b>       | <b>100</b>  |              |
